# Supplementary material
Source: Springer Nature journal article supplement (https://www.springermedizin.de/resource/supplementary/12887_2011_591_MOESM2_ESM.pdf/9475848)

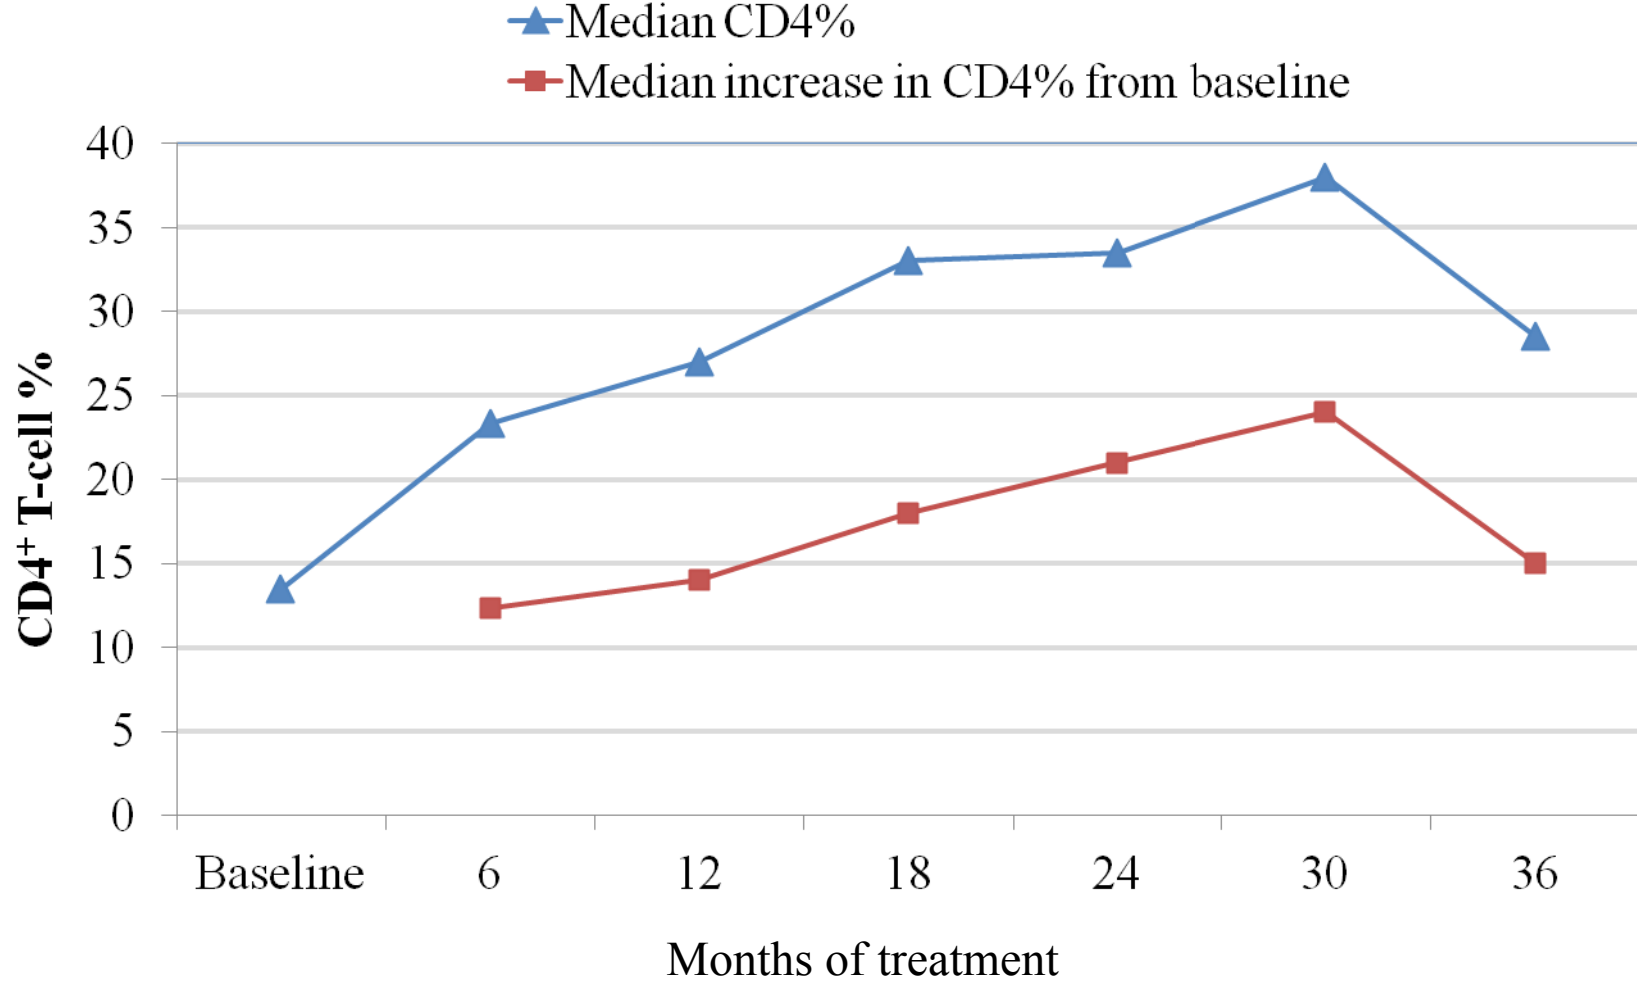

|                                         |           |           |           |           |           |          |          |
|-----------------------------------------|-----------|-----------|-----------|-----------|-----------|----------|----------|
| Number of children <5 years followed up | <b>34</b> | <b>25</b> | <b>16</b> | <b>14</b> | <b>11</b> | <b>8</b> | <b>5</b> |
| Number tested                           | <b>32</b> | <b>22</b> | <b>16</b> | <b>10</b> | <b>10</b> | <b>7</b> | <b>5</b> |

Supplement: MOESM2 [file 9475848]
